# Supplementary material for: Playing Charades in the fMRI: Are Mirror and/or Mentalizing Areas Involved in Gestural Communication?
Source: PLoS One. 2009 Aug 27;4(8):e6801. doi: 10.1371/journal.pone.0006801 (PMC2728843; doi:10.1371/journal.pone.0006801)
Supplement: Table S2 — Activation table for Passive Observation - Baseline - Table specifying for each supra-threshold cluster of activation during the contrast Passive Observation-Baseline, the t-value, location, anatomical description and, when available, probabilistically determined Brodmann area according to the anatomy toolbox (Eickhoff et al., 2005). (0.02 MB XLS) [file pone.0006801.s004.xls]

## Sheet: Obs (20 Subj)
	Main effects of passive observation					P (unc) < 0.001; T > 3.58; N = 20; K > 10
	Clustersize	T-value	Talairach			MNI			Hem.	Area	BA
	(K)		X	Y	Z	X	Y	Z
	74505	15.2	50	-70	3	50	-66	-2	Bilateral	Middle / Superior Temporal Gyrus
		12.32	-30	-52	55	-30	-48	50	Bilateral	Inferior Parietal Lobule
		11.99	32	-36	51	32	-32	46	Bilateral	Postcentral Gyrus	3a
		10.34	-38	-40	57	-38	-36	52	Bilateral	Postcentral Gyrus	2
		9.62	60	4	43	60	8	38	Bilateral	Precentral Gyrus	6
		9.31	10	8	73	10	12	68	Bilateral	SMA	6
		9.14	38	4	41	38	8	36	Bilateral	Middle Frontal Gyrus
		9.1	60	12	33	60	16	28	Bilateral	Inferior Frontal Gyrus	44
		8.96	-60	-46	29	-60	-42	24	Bilateral	SupraMarginal Gyrus
		8.42	-54	-28	57	-54	-24	52	Bilateral	Postcentral Gyrus	1
		8.14	54	12	-9	54	16	-14	Bilateral	Temporal Pole
	Reductions in BOLD signal during Observation
	1287	9.16	-24	-56	17	-24	-52	12	L	Precuneus
	97	4.21	-4	-52	-29	-4	-48	-34	L	Cerebelum (IX)
	26	4.49	-16	14	21	-16	18	16	L	Caudate Nucleus
